# Supplementary material
Source: Springer Nature journal article supplement (https://www.springermedizin.de/resource/supplementary/13053_2010_152_MOESM9_ESM.pdf/9674326)
Supplement: MOESM9 [file 9674326]

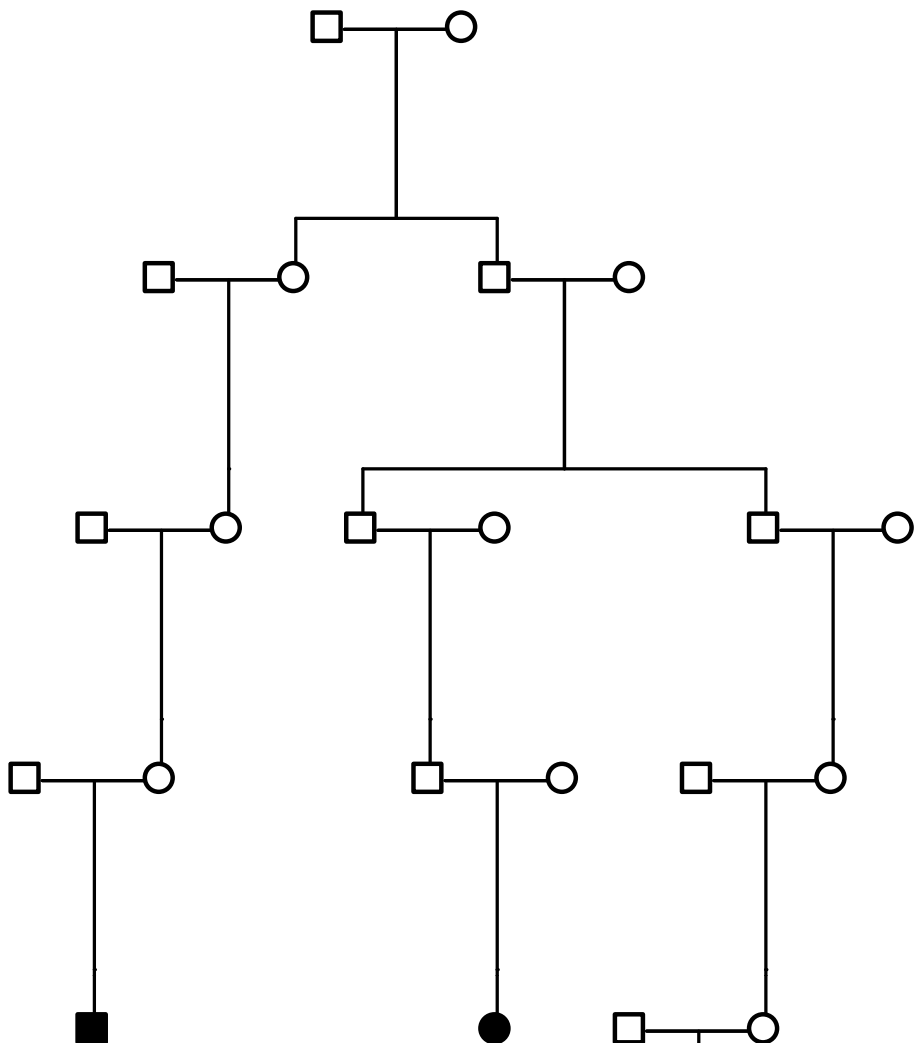

Family 1, III:3

Co-50

Co-56

sebaceous gland adenoma  
squamous cell carcinoma

Family 2, III:1

Co-45

Ut-48

Pb

Family 6, III-4

Duodenal ca-31

Adenoma-31

Co-37
